1  
2 **A robust method for RNA extraction and purification from a single adult mouse tendon**

3  
4  
5  
6  
7  
8

9 **Grinstein M<sup>\*1</sup>, Dingwall HL<sup>\*2</sup>, Shah RR<sup>1</sup>, Capellini TD<sup>2,3</sup>, Galloway, JL<sup>1,4,#</sup>**

10  
11  
12  
13  
14

15 **\*co-first authorship**

16  
17  
18  
19

17 **<sup>1</sup>Center for Regenerative Medicine, Department of Orthopaedic Surgery, Massachusetts  
18 General Hospital, Harvard Medical School, Boston, MA 02114**

20  
21

20 **<sup>2</sup>Department of Human Evolutionary Biology, Harvard University, Cambridge, MA 02138**

22  
23

22 **<sup>3</sup>Broad Institute of Harvard and MIT, Cambridge, MA 02138**

24  
25

24 **<sup>4</sup>Harvard Stem Cell Institute**

26

26 **#corresponding author: [jgalloway@mgh.harvard.edu](mailto:jgalloway@mgh.harvard.edu)**

27 **Abstract**

28

29 **Background.** Mechanistic understanding of tendon molecular and cellular biology is crucial  
30 towards furthering our abilities to design new therapies for tendon and ligament injuries and  
31 disease. Recent transcriptomic and epigenomic studies in the field have harnessed the power of  
32 mouse genetics to reveal new insights into tendon biology. However, many mouse studies pool  
33 tendon tissues or use amplification methods to perform RNA analysis, which can significantly  
34 increase the experimental costs and limit the ability to detect changes in expression of low copy  
35 transcripts.

36 **Methods.** Single Achilles tendons were harvested from uninjured, contralateral injured, and wild  
37 type mice between 3-5 months of age, and RNA was extracted. RNA Integrity Number (RIN)  
38 and concentration were determined, and RT-qPCR gene expression analysis was performed.

39 **Results.** After testing several RNA extraction approaches on single adult mouse Achilles  
40 tendons, we developed a protocol that was successful at obtaining high RIN and sufficient  
41 concentrations suitable for RNA analysis. We found that the RNA quality was sensitive to the  
42 time between tendon harvest and homogenization, and the RNA quality and concentration was  
43 dependent on the duration of homogenization. Using this method, we demonstrate that analysis  
44 of *Scx* gene expression in single mouse tendons reduces the biological variation caused by  
45 pooling tendons from multiple mice. We also show successful use of this approach to analyze  
46 *Sox9* and *Colla2* gene expression changes in injured compared with uninjured control tendons.

47 **Discussion.** Our work presents a robust, cost-effective, and straightforward method to extract  
48 high quality RNA from a single adult mouse Achilles tendon at sufficient amounts for RNA-seq  
49 and RT-qPCR. We show this can reduce biological variation and decrease the overall costs  
50 associated with experiments. This approach can also be applied to other skeletal tissues as well  
51 as precious human samples.

52

53

54

## 55 **Introduction**

56

57 Tendon injuries are common problems for active individuals and the aging population  
58 (Kaux J-F 2011). Treatment options include physical therapy and surgical intervention, but pain  
59 and limited mobility often persist, making complete restoration of tendon function challenging  
60 (Nourissat et al. 2015). Our current understanding of the molecular and cellular pathways  
61 regulating tendons during homeostasis, healing, and aging are limited. Several studies using  
62 large animal models such as sheep, rabbits, and rats have provided important information about  
63 tendon injury, biomechanics, surgical techniques, and bioengineering strategies for tendon repair  
64 (Voleti 2012). Other studies have used mouse genetics to gain an understanding of the molecular  
65 and cellular response of tendons to acute injuries, changing load environments, and in gene loss-  
66 of-function models (Mendias et al. 2008), (Dunkman et al. 2014; Dymment et al. 2014), (Howell et  
67 al. 2017), (Wang et al. 2017). The mouse system offers unique advantages for implementing  
68 mechanistic studies of tendon biology as they permit genetic lineage tracing and conditional  
69 knockout strategies, and they can be housed simply and in large numbers to improve sample  
70 sizes for functional studies. Even with inbred mouse strains, inter-animal variation can affect the  
71 conclusions drawn from gene expression analyses (Sultan et al. 2007), (Watkins-Chow & Pavan  
72 2008). Therefore, the use of several biological replicates of tendon tissues obtained from  
73 individual mice for RNA analysis is essential for furthering our mechanistic understanding of  
74 tendon biology.

75 Mature tendons are comprised of type I collagen, which are arranged in a highly ordered  
76 hierarchical manner along the long axis of the tissue (Kannus 2000). Tendon cells lie between  
77 these organized fibrils and are surrounded by a hydrophilic, glycoprotein-rich ground substance  
78 (Kannus 2000) (Yoon & Halper 2005), (Bi et al. 2007). This dense, fibrous, water-rich matrix  
79 that surrounds the tendon cells poses a significant challenge for the acquisition of high-quality  
80 RNA. In addition, tendons have low cell density compared with other tissues such as muscle or  
81 liver, resulting in minimal RNA yield per gram of tissue (Kannus 2000; Reno et al. 1997).

82 Previous studies have described protocols for RNA extraction from human or larger  
83 mammalian animal models such as rabbit (Ireland & Ott 2000), (Reno et al. 1997), but analyzing  
84 RNA from small animal models such as mouse can be more difficult. This has led to several  
85 different strategies for achieving RNA yield and quality sufficient for gene expression analysis  
86 by RT-qPCR or RNA-seq. RNA amplification methods have permitted gene expression analysis

87 of single injured and uninjured tendons (Dunkman et al. 2014), but this can be prohibitively  
88 expensive for analyzing a large number of samples or target genes, currently possible using the  
89 mouse system. In addition, studies in other tissues have shown that amplification can lead to  
90 biased results and increased false negative rates, especially for low- and medium-copy transcripts  
91 (Dunkman et al. 2014). Mendias and colleagues, (Mendias et al. 2008; Mendias et al. 2012) and  
92 Nielson and colleagues (Nielsen et al. 2014) have performed expression analysis on a single  
93 mouse Achilles or plantaris tendon in different loss-of-function mouse models or in altered  
94 loading conditions. However, this approach is not widespread in the literature and the studies,  
95 although reporting a good 260/280 ratio, do not report on the RNA integrity as they mainly  
96 performed RT-qPCR. However, there are examples of many studies that pool a large number of  
97 tendons (e.g., 12-20 individual tendons) (Bell et al. 2013), (Trella et al. 2017). Not only does this  
98 increase the mouse cohort size and experimental costs, but it can also enlarge the inter-individual  
99 variation, which may explain some of the large variability in transcript abundance that was found  
100 in subsets of their gene expression analysis (Trella et al. 2017). Lastly, other studies have  
101 focused on tendon-derived cell populations such as tendon stem/progenitor cells (Bi et al. 2007).  
102 This approach will result in robust RNA yields, but it queries a cell population that has been  
103 expanded in culture and could have altered transcriptomic and epigenomic states compared with  
104 that of the native tendon tissue.

105         The various technical limitations associated with obtaining high-quality, high-yield RNA  
106 enlarges the cohorts of mice needed for statistical analysis, and hinders the use of RT-qPCR or  
107 functional genomic assays such as RNA-seq on single adult mouse tendons. Here, we present a  
108 robust, low-cost, and straightforward RNA isolation protocol that enables the isolation of high-  
109 integrity RNA from a single mouse Achilles tendon. We show that pooling tendon samples  
110 inflates biological variance estimates for gene expression data in RT-qPCR analysis. We apply  
111 this method to analyze injured and contralateral uninjured tendons and demonstrate the detection  
112 of significant and reproducible gene expression changes. In addition, this method can be used to  
113 purify high quality RNA from other musculoskeletal tissues, making it easily adaptable to  
114 multiple connective and skeletal tissue types, or from difficult to obtain tissues from humans or  
115 other organisms.

116

117

118 **Methods**

119

120 **Mouse Studies**

121 Achilles tendons were collected from wildtype C57BL/6 mice between 3-5 months of age  
122 (Jackson Laboratories 00664, n = 30 total). To compare gene expression levels between injured  
123 and uninjured Achilles tendons in the same mouse, excisional Achilles tendon injuries were  
124 performed using a 0.3 mm biopsy punch as described (Beason et al. 2012). The incision was  
125 closed with 6-0 Ethilon nylon sutures and the tendons were harvested 30 days after injury for  
126 analysis. Mice were housed, maintained, and euthanized according to American Veterinary  
127 Medical Association guidelines. All experiments were performed according to our Massachusetts  
128 General Hospital Institutional Animal Care and Use Committee (IACUC: 2013N000062)  
129 approved protocol.

130

131 **RNA Extraction and Purification**

132 Dissected Achilles tendons were placed immediately into 1.5 ml tubes containing 500 µl of  
133 TRIzol reagent (Invitrogen Cat# 15596026) and high impact zirconium 1.5 mm beads (30-40  
134 beads per tube, D1032-15 Benchmark). Samples were homogenized immediately in two, 180-  
135 second rounds of bead beating at 50 Hz (BeadBug microtube homogenizer). Samples were then  
136 moved directly to dry ice or -80°C for longer storage up to 6 months.

137 To extract RNA, the samples were thawed on ice followed by a 5 minute incubation at  
138 room temperature. Samples were quickly spun in the sample tubes and the homogenate was  
139 moved to a new Eppendorf tube, leaving behind the beads and residual tissue. Next, a chloroform  
140 extraction was performed, using double the recommended amount, which has been shown to  
141 increase RNA yields in small samples (Macedo 2014). 100 µl of chloroform was added to the  
142 homogenate and vortexed well for approximately 1 minute. The Trizol/chloroform mixture was  
143 then moved to a 1.5 ml MaXtract high density tube (Qiagen Cat No. 129046), incubated at room  
144 temperature for 2-3 minutes, and spun  $\geq 12,000 \times g$  at 4°C for 15 minutes. MaXtract tubes  
145 contain a sterile gel that forms a barrier between the RNA-containing aqueous phase and the  
146 Trizol/chloroform upon centrifugation at 4°C, thus minimizing carryover of organic solvents  
147 leading to an overall reduction in sample contamination. After centrifugation, the aqueous phase  
148 was transferred to a clean 1.5 ml Eppendorf tube and an equal volume of 100% ethanol was

149 added to the aqueous phase and mixed well. At this stage, the RNA/ethanol mix was typically  
150 stored at -80°C. We have found that brief incubation of this mixture at -80°C improved the total  
151 RNA yield, yet it is not required.

152 RNA purification was next performed using the ZR Tissue & Insect RNA MicroPrep kit  
153 (Zymo Research R2030) or the Direct-Zol systems (Zymo Research R2050, R2060). Based on  
154 typical tendon yields, the ZymoSpin IC spin columns are optimal for use with RNA extracted  
155 from single tendons as these columns can purify up to 5 µg of RNA in as little as 6 µl eluate.  
156 However, this protocol also has been successfully used with ZymoSpin IIC columns, which  
157 require a larger elution volume. After adding the RNA/ethanol mix to the spin column, the  
158 standard Zymo purification protocol was used with the following modifications. First, a 15-  
159 minute on-column DNase I treatment was added to minimize genomic DNA contamination. An  
160 extra wash step was included to improve sample purity. Prior to elution, columns were spun for  
161 an additional 2 minutes at maximum speed to remove residual ethanol. RNA was eluted in 15 µl  
162 RNase/DNase free water that was pre-warmed to 55-60°C to maximize the RNA recovery from  
163 the spin column. RNA concentration was measured via fluorometric quantitation (Qubit HS  
164 RNA assay, Invitrogen, CAT# Q32852) and sample quality was determined by  
165 spectrophotometric analysis (NanoDrop 2000c, ThermoFisher Scientific) as well as capillary  
166 electrophoresis (2100 Bioanalyzer, Agilent). The final RNA product was stored at -80C for RT-  
167 qPCR analysis.

168

### 169 **RT-qPCR, Data Analysis, and Statistics**

170 100 ng total RNA was reverse transcribed with oligo(dT)<sub>20</sub> primers using the SuperScript IV  
171 First Strand Synthesis System (Thermo Fisher 18091050) and a no-reverse transcriptase control  
172 was included for every sample. A total of 2 ng cDNA template was amplified for 40 cycles in  
173 each SYBR green qPCR assay (Applied Biosystems 4367659) using a final primer concentration  
174 of 200 nM. All assays were performed in technical triplicate using either a LightCyclerII 480  
175 (Roche; pooled samples) or a StepOnePlus Real Time PCR system (Applied Biosystems; injury  
176 samples). Three independent biological samples were run per condition for both sets of RT-  
177 qPCR. *Gapdh* was used as the reference gene for all samples (see Table 1 for primer sequences).

178 All analyses were conducted in R (R Core Team 2017). For the pooling experiment,  
179 summary statistics were calculated for *Scleraxis* (*Scx*) and *Gapdh* technical and biological

180 replicate cycle threshold ( $C_T$ ) values independently. Variance estimates for *Scx*  $\Delta C_T$  relative  
181 expression were calculated using standard error propagation techniques. Relative expression  
182 values for *Collagen Ia2* (*Colla2*) and *SRY-Box9* (*Sox9*) were calculated for the injury analysis  
183 using the  $\Delta\Delta C_T$  method (Livak & Schmittgen 2001) and injury samples were normalized to their  
184 corresponding uninjured contralateral controls. Statistical differences between injured and  
185 uninjured samples from three biological replicates (n=3 mice) were analyzed via Welch's t-test  
186 (Welch 1947) on the  $\Delta C_T$  values.

187  
188  
189

## 190 **Results**

191 Several tissue disruption methods were tested in order to achieve optimal RNA quality  
192 and quantity from a single mouse tendon. Among those tested were enzymatic digestion,  
193 cryogenic grinding (manual and mill), shearing with a handheld homogenizer (i.e., rotor-stator),  
194 and bead beating. Capillary electrophoresis was performed on purified RNA using a Bioanalyzer  
195 RNA Nano chip (Agilent). RNA integrity number (RIN), a quantification of degradation, was  
196 calculated by the accompanying Agilent software based on the electropherogram for a given  
197 sample; a RIN of 10 indicates completely intact RNA whereas a RIN of 1 indicates severely  
198 degraded RNA. Enzymatic digestion produced intact RNA (RIN > 7), but low RNA yield ( $\leq$   
199 1ng/ $\mu$ l). Cryogenic grinding and handheld homogenizer dissociation methods resulted in low  
200 yield ( $\leq$  5ng/ $\mu$ l) and poor RNA integrity (RIN  $\leq$  3). Bead beater homogenization was found to  
201 produce the best results in terms of RNA quality (i.e., RIN  $\geq$  6.5) and quantity ( $\geq$  50 ng/ $\mu$ l),  
202 and minimized carryover between samples. Additionally, bead beating was easily combined with  
203 standard TRIzol extraction and commercially available purification methods.

204 To further evaluate our bead beating homogenization method, we performed additional  
205 experiments examining the level of degradation that occurs prior to homogenization as well as  
206 during homogenization. To address the former, single Achilles tendons from similarly aged mice  
207 were left on ice following dissection for up to 9 minutes before homogenization in the bead  
208 beater. The shortest time between dissection and homogenization (0-30 seconds) yielded more  
209 intact RNA (RIN = 6.5) while longer wait times resulted in more degraded RNA (9 minutes  
210 processing time RIN = 5.4; Figure 1). This demonstrates that measurable degradation can occur

211 prior to sample homogenization, and occurs with increases in time after dissection on the order  
212 of only minutes (Figure 1). Therefore, processing the dissected tendon(s) immediately following  
213 dissection is essential for preserving RNA integrity. We next tested how the duration of bead  
214 beating affects RNA quality by varying homogenization times of single and four pooled Achilles  
215 tendons. Samples were homogenized for 30 seconds, 60 seconds, 180 seconds, or 360 seconds  
216 (in two consecutive rounds of 180 seconds; Figure 2 A, B). RNA from samples homogenized for  
217 less than 60 seconds suffered more degradation than those that underwent longer homogenization  
218 times (Figure 2B), indicating incomplete homogenization of the tissue during the shorter bead-  
219 beating periods. Homogenization times longer than 360 seconds did not improve RNA quality,  
220 and in some cases caused further degradation.

221 To test whether pooling tendons from multiple individuals into one sample prior to  
222 homogenization influences RNA integrity, we measured RNA quality from single Achilles  
223 tendons as well as pools of differing sizes (2, 4, 6, and 8 tendons,  $n = 3$  biological replicates per  
224 pooling level; Figure 3 A, B). Electropherograms and RIN measurements show that RNA from  
225 all pooling levels suffer levels of degradation similar to single Achilles samples (Figure 3A, B).  
226 Therefore, pooling tendons from multiple individuals is not protective against RNA degradation;  
227 the only measure that improved with increased pool size was RNA yield (Figure 3C). To  
228 determine if pooling multiple samples affects gene expression measurements, we evaluated gene  
229 expression in single and differentially pooled tendon samples described above ( $n = 3$  per pooling  
230 level) via RT-qPCR. Although we find no gain in RNA quality from pooling, treating pools of  
231 tendons from multiple individuals as single biological replicates results in larger standard  
232 deviations in  $C_T$  measurements in assays for *Scx* and *Gapdh* (Figure 4). This leads to larger  
233 sample variance for larger pools, driven by differences in  $\Delta C_T$  between biological replicates  
234 within a group, which impedes the detection of small gene expression changes. Such increases in  
235 variance for pooled versus single samples have also been reported for RNA-seq datasets  
236 (Rajkumar et al. 2015).

237 To validate the performance of the RNA obtained using this protocol, we performed RT-  
238 qPCR for *Sox9* and *Colla2* expression on single Achilles tendons at 30 days following an acute  
239 excision Achilles tendon injury. All samples were obtained from single injured and contralateral  
240 uninjured Achilles tendons from the same mouse. Using this protocol, we found significantly  
241 increased expression of *Sox9* and *Colla2* in injured Achilles tendons compared with their



242 uninjured contralateral counterparts ( $p < 0.05$  for *Sox9* and  $P < 0.01$  for *Colla2*; Figure 5). These  
243 results are consistent with previous studies showing increased expression of *Sox9* and *Colla2*  
244 following tendon injury (Guerquin et al. 2013) (Zhang & Wang 2013), and also show that our  
245 method is robust to detect gene expression changes in single tendon samples.

246

247

## 248 **Discussion and Conclusions**

249

250 Obtaining high quality RNA from tendons can be challenging, and this can limit the  
251 direction and scope of studies focused on analysing adult mouse tendon tissues. Whereas a few  
252 studies have used single tendons without amplification, many other studies have used  
253 amplification or pooling of greater than 12 samples to detect gene expression changes. Both  
254 approaches can be expensive due to the high costs associated with amplification kits for multi-  
255 gene analysis or the number of mice used for one biological replicate. Dissociation, followed by  
256 culture and expansion of tendon-derived cells can yield greater RNA concentrations of high  
257 quality, but such approaches cannot be used to study gene expression changes after injury. The  
258 approach we described above provides a straightforward method to consistently obtain high  
259 yields of RNA from one Achilles tendon of sufficient quality to perform RT-qPCR analysis  
260 without amplification. In addition, the reported RIN scores are acceptable for standard RNA-seq  
261 differential expression analysis.

262 Our analysis also uncovered key steps that are integral towards generating high RIN and  
263 concentration from the single tendon samples. In particular, we find that the time from dissection  
264 to homogenization and storage can significantly impact the quality of the RNA, causing  
265 measurable degradation. In this regard, *even* small delays on the order of minutes could affect  
266 overall RNA quality, which could greatly affect differential gene expression analysis. In  
267 addition, the duration of homogenization is important for maximizing RNA yield and quality.  
268 Homogenization times that are too short or long can result in dramatically different RIN and  
269 concentrations regardless of the level of sample pooling.

270 Similar to previous RNA-seq studies, our RT-qPCR analysis of single and pooled tendon  
271 samples revealed that pooling increases the variance of gene expression measurements  
272 (Rajkumar et al. 2015). It has been argued that pooling samples from multiple individuals into

273 single biological replicates results in biological averaging and is therefore an appropriate, and  
274 even useful, practice in gene expression studies via microarray (Kendzierski et al. 2005)  
275 However, genes, which are lowly expressed or exhibit subtle differences between conditions,  
276 would require a larger sample size of pools to achieve adequate statistical power, which would  
277 further inflate mouse and reagent cost for RT-qPCR, microarray, or RNA-seq analyses (Shih et  
278 al. 2004). This analysis also highlights the problem of performing RT-qPCR comparisons on a  
279 single pool per group (run in technical triplicate), under the assumption that the within-sample  
280 variation is representative of the biological variation among all animals of that group. Variance  
281 calculated from technical repeats does not estimate biological variance within each group, and is  
282 not an appropriate practice. The technical variation arises from noise due to measurement error  
283 and therefore is unrelated to biological variation (Kitchen et al. 2010; Vaux et al. 2012),  
284 necessitating the use of multiple pools for any statistical analysis.

285 Our tendon RNA extraction method is a robust protocol for obtaining high quality RNA  
286 for gene expression assays. It decreases the number of mice required for analysis and avoids  
287 extra amplification steps, making it straightforward, cost-effective, and easily accessible to  
288 researchers new to the tendon field. By providing a means for reproducibly analyzing one  
289 Achilles tendon, this method also reduces measurement error associated with pooling tendons  
290 from multiple individuals. Moreover, our protocol permits the use of internal comparisons  
291 between a limb that has undergone experimental manipulation (e.g., injury or unloading) and the  
292 contralateral control limb within the same animal. In addition to facilitating larger-scale RT-  
293 qPCR studies, we believe this method will make high dimensional gene expression analysis such  
294 as RNA-seq accessible to more researchers in the tendon and other musculoskeletal biology  
295 fields, thus opening new frontiers in tendon biology.

296

297

298 **Acknowledgements:** We would like to thank the Harvard University Bauer Core Facility and  
299 MGH Center for Comparative Medicine for their services. J.L.G, H.L.D., M.G., and T.D.C. were  
300 supported by AR071554 NIAMS/NIH. J.L.G. and R.R.S. were supported by the American  
301 Federation of Aging Research and the Harvard Stem Cell Institute. M.G. was supported by  
302 Human Frontiers Science Program Fellowship. T.D.C was supported by the Milton Fund and  
303 Dean's Competitive Fund (Harvard University).

304

305

306

307

308 Table 1. Primers used for RT-qPCR

| <b>Gene</b>   | <b>Forward Primer (5' to 3')</b> | <b>Reverse Primer (5' to 3')</b> |
|---------------|----------------------------------|----------------------------------|
| <i>Sox9</i>   | AGTACCCGCATCTGCACAAC             | TACTTGTAATCGGGGTGGTCT            |
| <i>Colla2</i> | CCAGCGAAGAACTCATACAGC            | GGACACCCCTTCTACGTTGT             |
| <i>Scx</i>    | AAGTTGAGCAAAGACCGTGAC            | AGTGGCATCCACCTTCACTA             |
| <i>Gapdh</i>  | TGTTCTACCCCAATGTGT               | GGTCCTCAGTG TAGCCAAG             |

309

310

311 **Figure Legends**

312

313 **Figure 1. Length of time between dissection and processing affect RNA integrity**

314 Electropherogram digital gel via Bioanalyzer shows integrity of RNA isolated from single  
315 Achilles tendons that were kept on ice for various lengths of time (0, 3, 6, 9 minutes) before  
316 homogenization. All were homogenized for 360 seconds. Longer wait times prior to  
317 homogenization reduce RNA quality. 18S and 28S are indicated and the green band is a marker.

318

319 **Figure 2. Optimization of homogenization regime**

320 Single Achilles tendons and pools of four tendons were subjected to different durations of bead  
321 beating homogenization: 30, 60, 180, and 360 (in two rounds of 180) seconds. The  
322 electropherogram digital gel shows that the longest beating time resulted in the most intact RNA,  
323 as evidenced by the strong 28s and 18s bands with 360 seconds (A). RIN values called by  
324 Agilent software also show the improvement in quality with longer beating time (B). More than  
325 360 seconds showed no appreciable improvement in RNA integrity (data not shown).

326

327 **Figure 3. Tendon pooling affects RNA quality and yield**

328 Representative electropherogram digital gel of RNA from different-sized pools of Achilles  
329 tendons demonstrates high integrity RNA across all samples (A). Called RINs for pools (n = 3  
330 per pool) demonstrates that RNA quality from a single tendon is comparable to that from pools  
331 of tendons. Sample RINs are sufficiently high for use in RNA-seq gene counting and differential  
332 expression analysis for as low as one Achilles tendon (B). Concentration of RNA from single or  
333 pooled tendons increases with tendon number (n = 3 per pool) (C). The middle line represents  
334 the median, the box is quartiles 2 and 3 interquartile range (IQR), and whiskers are 1.5 x IQR (B,  
335 C).

336

337 **Figure 4. Sample pooling affects estimates of sample variance in RT-qPCR**

338  $C_T$  standard deviations for *Scx* (A) and *Gapdh* (B) measurements were calculated for the  
339 technical replicates (n = 3 repeat measurements; dark grey) and for biological replicates (n = 3  
340 independent samples; light grey), separately.  $\Delta C_T$  was calculated by normalizing *Scx*  $C_T$  values  
341 to *Gapdh*. Technical (dark grey) and biological (light grey) variance estimates were calculated

342 separately (C). All measures (A-C) show that biological variance increases as number of  
343 individuals contributing to a pool increases.

344

345 **Figure 5. Sensitivity and reproducibility of RT-qPCR on single tendon RNA**

346 RT-qPCR of *Sox9* (A) and *Col1a2* (B) expression of injured Achilles tendons relative to the  
347 contralateral tendon of the same mouse at 30 days post injury. A Welch's t-test shows that both  
348 *Sox9* and *Col1a2* expression was significantly different in the injured condition compared to the  
349 control tendons (n = 3 biological replicates, (p < 0.05 for *Sox9* and P< 0.01 for *Col1a2*).

350

351

352 **References**

353

354 Beason DP, Kuntz AF, Hsu JE, Miller KS, and Soslowsky LJ. 2012. Development and  
355 evaluation of multiple tendon injury models in the mouse. *Journal of biomechanics*  
356 45:1550-1553.

357 Bell R, Li J, Gorski DJ, Bartels AK, Shewman EF, Wysocki RW, Cole BJ, Bach Jr BR, Mikecz  
358 K, and Sandy JD. 2013. Controlled treadmill exercise eliminates chondroid deposits and  
359 restores tensile properties in a new murine tendinopathy model. *Journal of biomechanics*  
360 46:498-505.

361 Bi Y, Ehrichiou D, Kilts TM, Inkson CA, Embree MC, Sonoyama W, Li L, Leet AI, Seo BM,  
362 Zhang L, Shi S, and Young MF. 2007. Identification of tendon stem/progenitor cells and  
363 the role of the extracellular matrix in their niche. *Nat Med* 13:1219-1227.

364 Dunkman AA, Buckley MR, Mienaltowski MJ, Adams SM, Thomas SJ, Kumar A, Beason DP,  
365 Iozzo RV, Birk DE, and Soslowsky LJ. 2014. The injury response of aged tendons in the  
366 absence of biglycan and decorin. *Matrix Biology* 35:232-238.

367 Dymant NA, Hagiwara Y, Matthews BG, Li Y, Kalajzic I, and Rowe DW. 2014. Lineage tracing  
368 of resident tendon progenitor cells during growth and natural healing. *PloS one* 9:e96113.

369 Guerquin M-J, Charvet B, Nourissat G, Havis E, Ronsin O, Bonnin M-A, Ruggiu M, Olivera-  
370 Martinez I, Robert N, and Lu Y. 2013. Transcription factor EGR1 directs tendon  
371 differentiation and promotes tendon repair. *The Journal of clinical investigation*  
372 123:3564.

373 Howell K, Chien C, Bell R, Laudier D, Tufa SF, Keene DR, Andarawis-Puri N, and Huang AH.  
374 2017. Novel Model of Tendon Regeneration Reveals Distinct Cell Mechanisms  
375 Underlying Regenerative and Fibrotic Tendon Healing. *Scientific reports* 7:45238.

376 Ireland ML, and Ott SM. 2000. The effects of pregnancy on the musculoskeletal system. *Clinical*  
377 *orthopaedics and related research* 372:169-179.

378 Kannus P. 2000. Structure of the tendon connective tissue. *Scandinavian*

379 *Journal of Medicine and Science in Sports* 10:312-320.

- 380 Kaux J-F FB, Goff CL, Crielaard J-M, Croisier J-L. 2011. Current Opinions on Tendinopathy.  
381 *Journal of Sports Science & Medicine* 10(2):238-253.
- 382 Kendzioriski C, Irizarry R, Chen K-S, Haag J, and Gould M. 2005. On the utility of pooling  
383 biological samples in microarray experiments. *Proceedings of the National Academy of*  
384 *Sciences of the United States of America* 102:4252-4257.
- 385 Kitchen RR, Kubista M, and Tichopad A. 2010. Statistical aspects of quantitative real-time PCR  
386 experiment design. *methods* 50:231-236.
- 387 Livak KJ, and Schmittgen TD. 2001. Analysis of relative gene expression data using real-time  
388 quantitative PCR and the 2- $\Delta\Delta$ CT method. *methods* 25:402-408.
- 389 Macedo NJ, and Ferreira TL. 2014. Maximizing Total RNA Yield from TRIzol Reagent  
390 Protocol: A Feasibility Study. ASEE 2014 Zone I Conference: 1-8.
- 391 Mendias CL, Bakhurin KI, and Faulkner JA. 2008. Tendons of myostatin-deficient mice are  
392 small, brittle, and hypocellular. *Proceedings of the National Academy of Sciences*  
393 105:388-393.
- 394 Mendias CL, Gumucio JP, Davis ME, Bromley CW, Davis CS, and Brooks SV. 2012.  
395 Transforming growth factor - beta induces skeletal muscle atrophy and fibrosis through  
396 the induction of atrogenin - 1 and scleraxis. *Muscle & nerve* 45:55-59.
- 397 Nielsen R, Clausen N, Schjerling P, Larsen JO, Martinussen T, List E, Kopchick J, Kjær M, and  
398 Heinemeier K. 2014. Chronic alterations in growth hormone/insulin-like growth factor-I  
399 signaling lead to changes in mouse tendon structure. *Matrix Biology* 34:96-104.
- 400 Nourissat G, Berenbaum F, and Duprez D. 2015. Tendon injury: from biology to tendon repair.  
401 *Nature reviews Rheumatology* 11:223-233.
- 402 Rajkumar AP, Qvist P, Lazarus R, Lescai F, Ju J, Nyegaard M, Mors O, Børglum AD, Li Q, and  
403 Christensen JH. 2015. Experimental validation of methods for differential gene  
404 expression analysis and sample pooling in RNA-seq. *BMC genomics* 16:548.
- 405 Reno C, Marchuk L, Sciore P, Frank CB, and Hart DA. 1997. Rapid isolation of total RNA from  
406 small samples of hypocellular, dense connective tissues. *Biotechniques* 22:1082-1086.



- 407 Shih JH, Michalowska AM, Dobbin K, Ye Y, Qiu TH, and Green JE. 2004. Effects of pooling  
408 mRNA in microarray class comparisons. *Bioinformatics* 20:3318-3325.
- 409 Sultan M, Piccini I, Balzereit D, Herwig R, Saran NG, Lehrach H, Reeves RH, and Yaspo M-L.  
410 2007. Gene expression variation in Down's syndrome mice allows prioritization of  
411 candidate genes. *Genome biology* 8:R91.
- 412 Trella KJ, Li J, Stylianou E, Wang VM, Frank JM, Galante J, Sandy JD, Plaas A, and Wysocki  
413 R. 2017. Genome - wide analysis identifies differential promoter methylation of *Leprel2*,  
414 *Foxf1*, *Mmp25*, *Igfbp6*, and *Peg12* in murine tendinopathy. *Journal of Orthopaedic*  
415 *Research* 35:947-955.
- 416 Vaux DL, Fidler F, and Cumming G. 2012. Replicates and repeats—what is the difference and is  
417 it significant? *EMBO reports* 13:291-296.
- 418 Voleti PB, Buckley, M. R. & Soslowsky, L. J. n. . 2012. Tendon healing: repair and regeneratio.  
419 *Annu Rev Biomed Eng* 14:47–71.
- 420 Wang Y, Zhang X, Huang H, Xia Y, Yao Y, Mak AF-T, Yung PS-H, Chan K-M, Wang L, and  
421 Zhang C. 2017. Osteocalcin expressing cells from tendon sheaths in mice contribute to  
422 tendon repair by activating Hedgehog signaling. *eLife* 6.
- 423 Watkins-Chow DE, and Pavan WJ. 2008. Genomic copy number and expression variation within  
424 the C57BL/6J inbred mouse strain. *Genome research* 18:60-66.
- 425 Welch BL. 1947. The generalization of student's' problem when several different population  
426 variances are involved. *Biometrika* 34:28-35.
- 427 Yoon JH, and Halper J. 2005. Tendon proteoglycans: biochemistry and function. *J Musculoskelet*  
428 *Neuronal Interact* 5:22-34.
- 429 Zhang J, and Wang JH. 2013. The effects of mechanical loading on tendons-an in vivo and in  
430 vitro model study. *PloS one* 8:e71740.
- 431

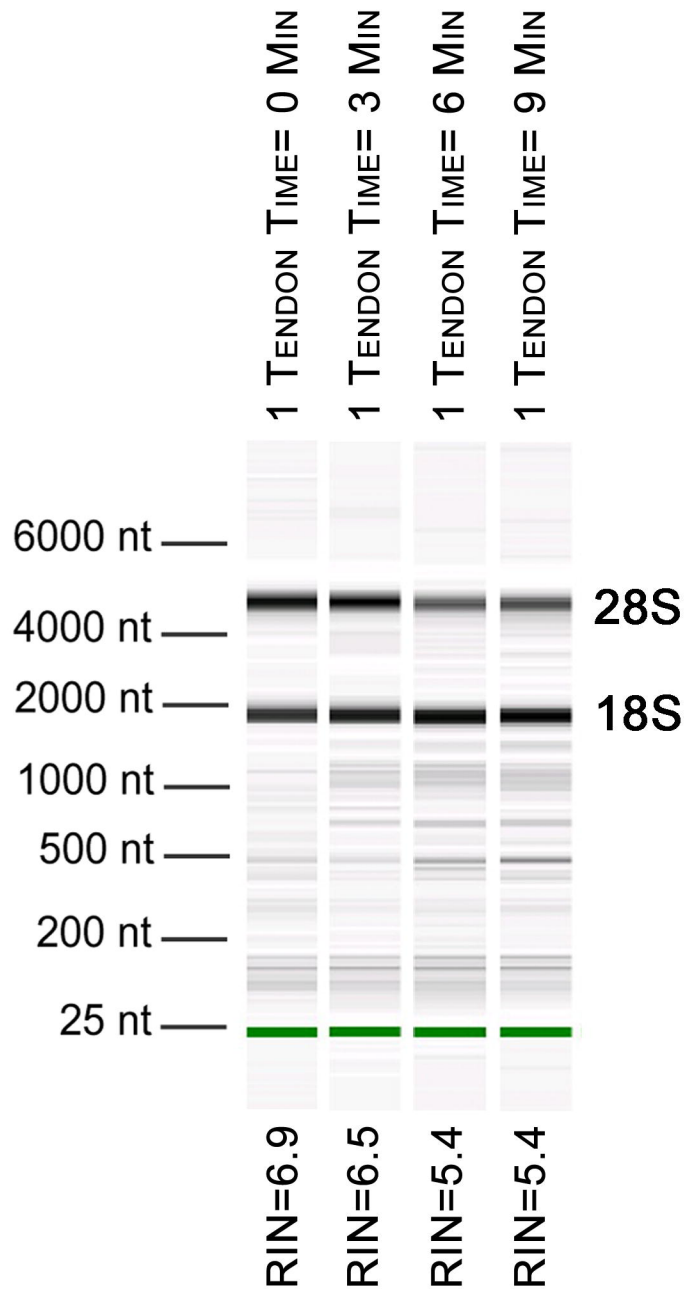

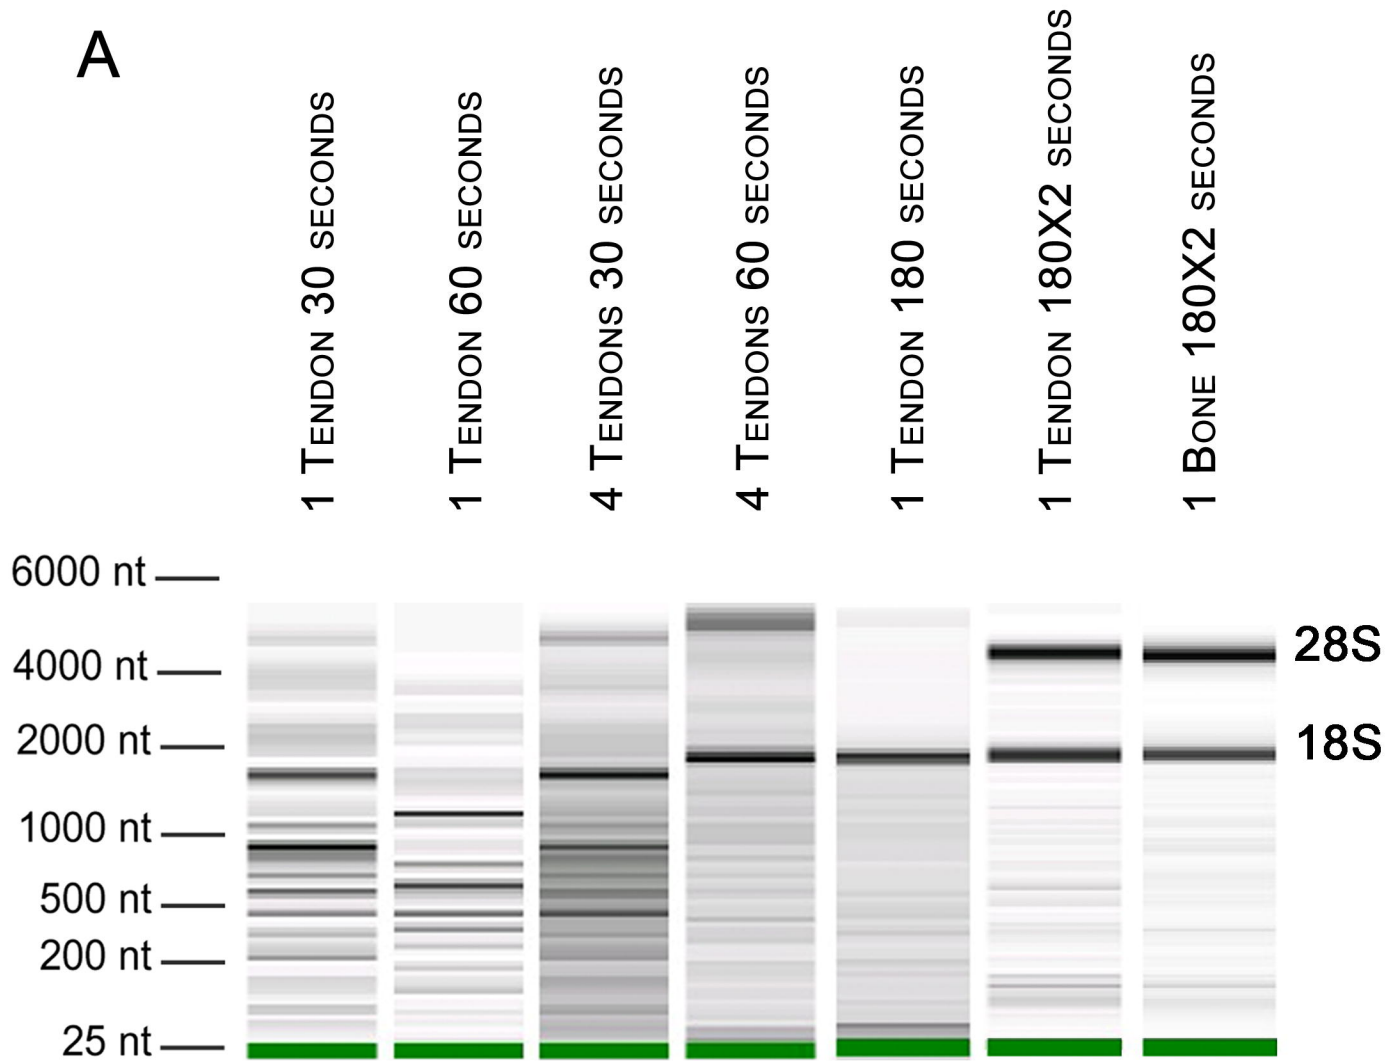

**B**

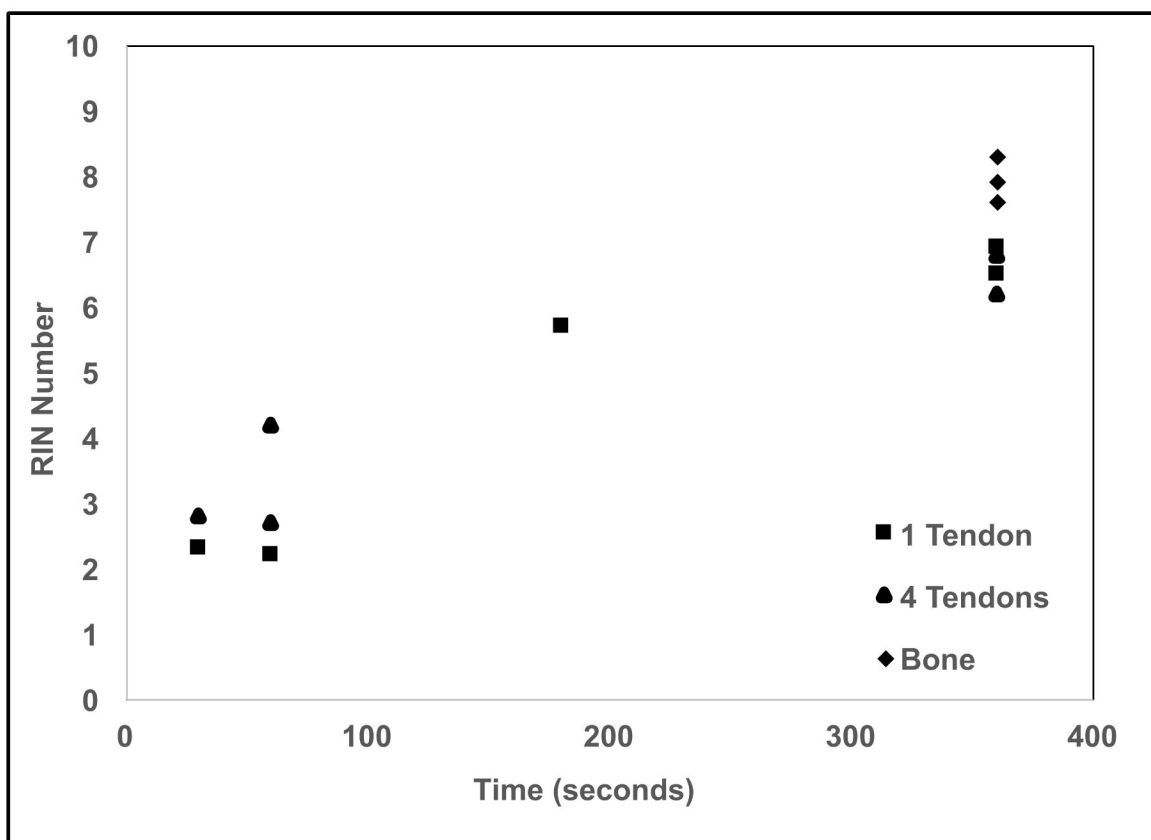

**A**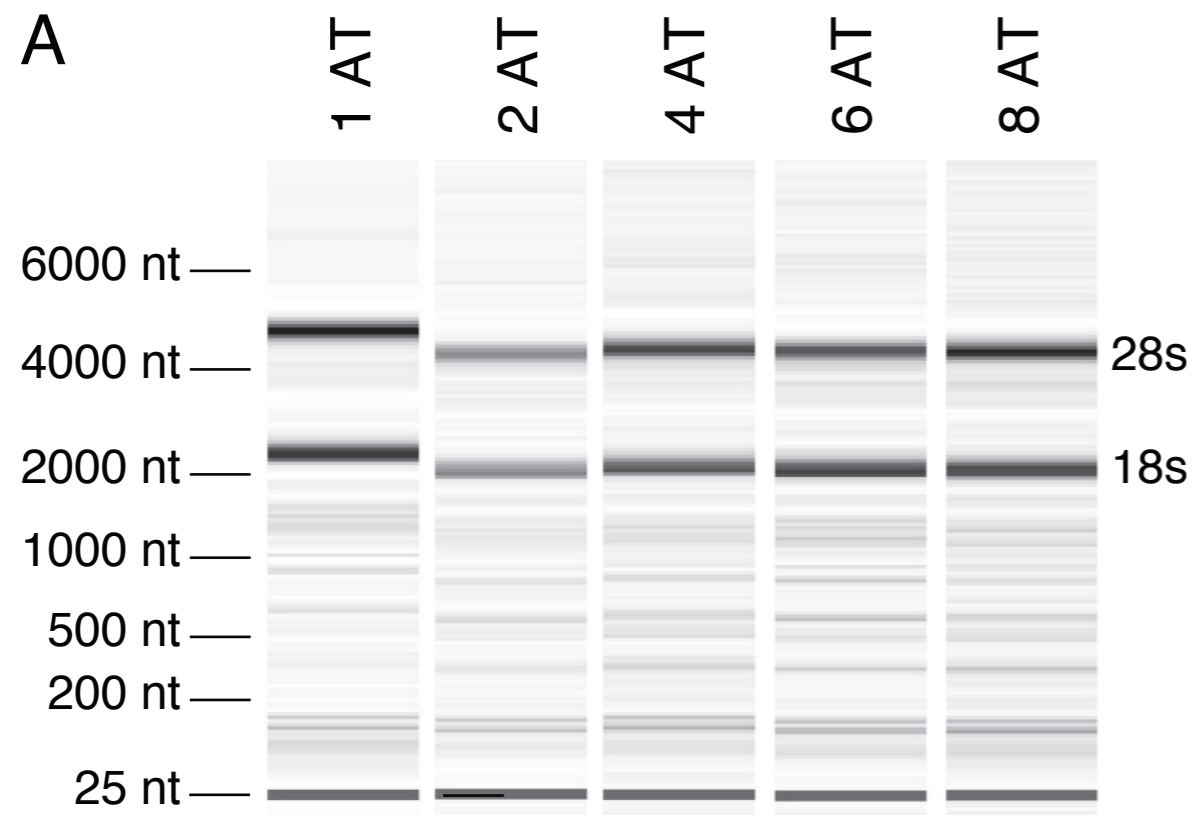**B**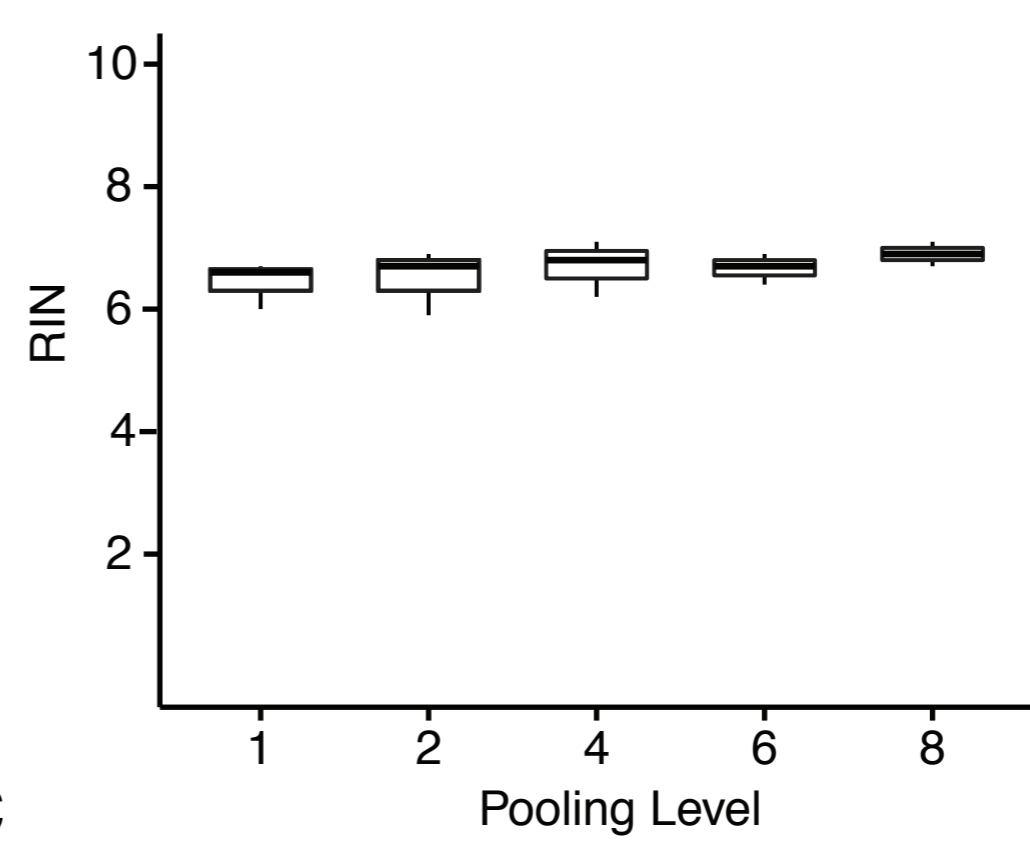**C**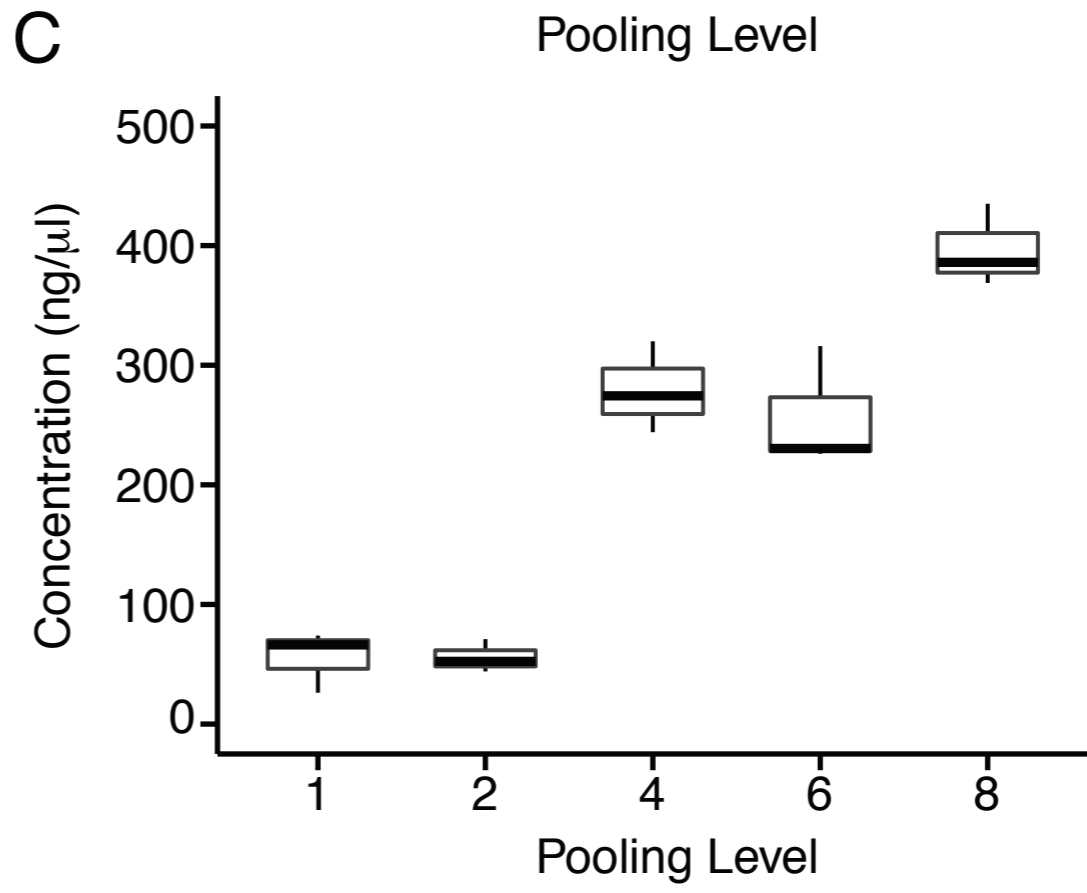

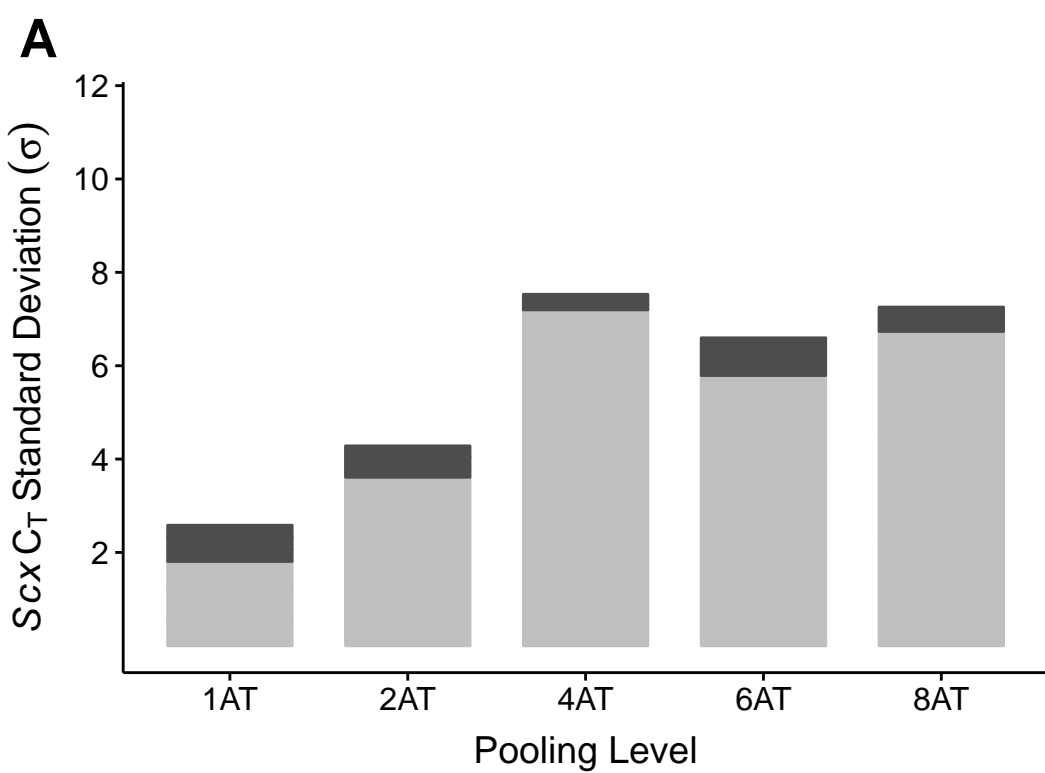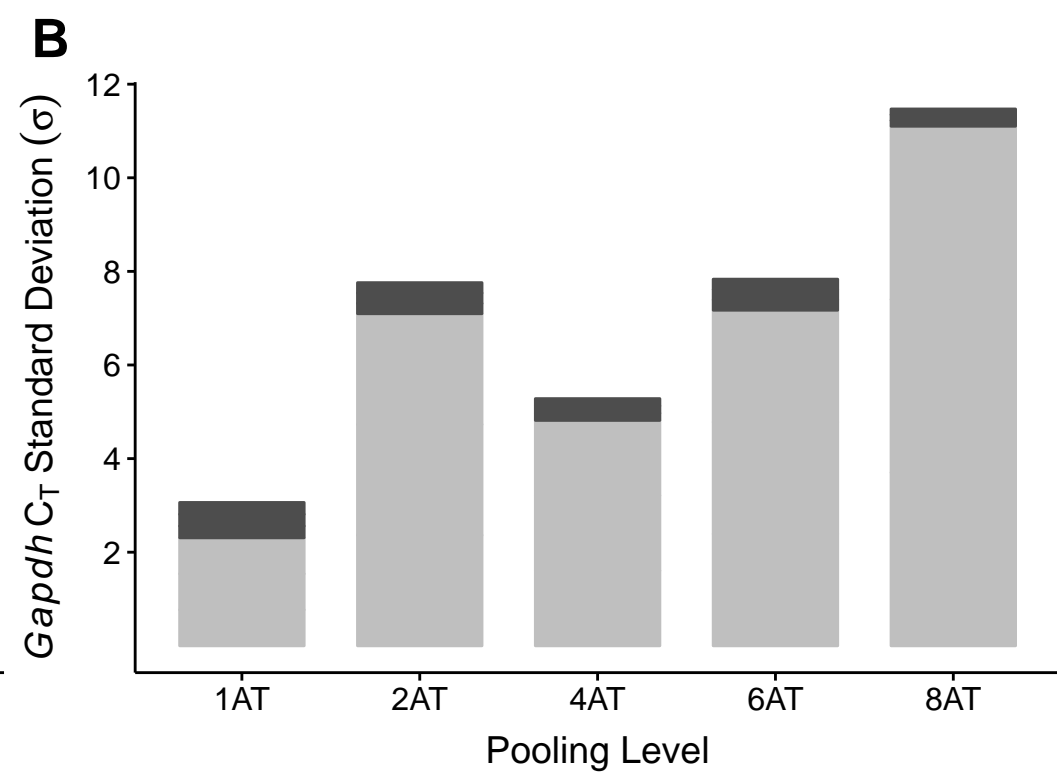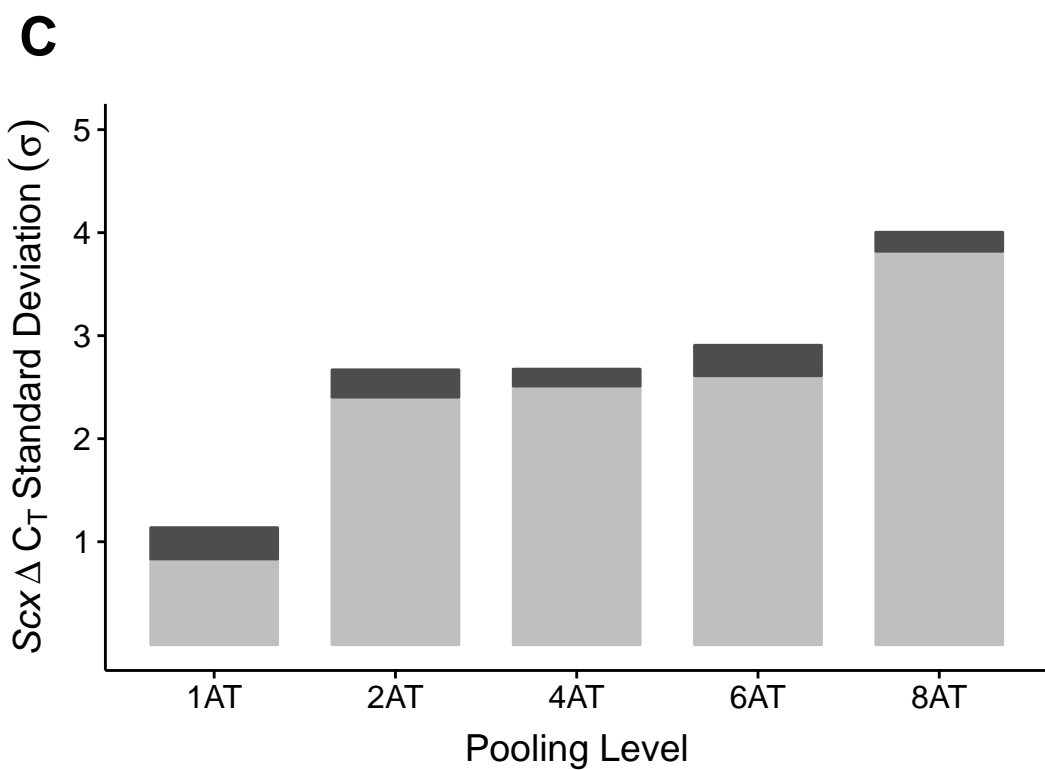

Source of Variation  technical  biological

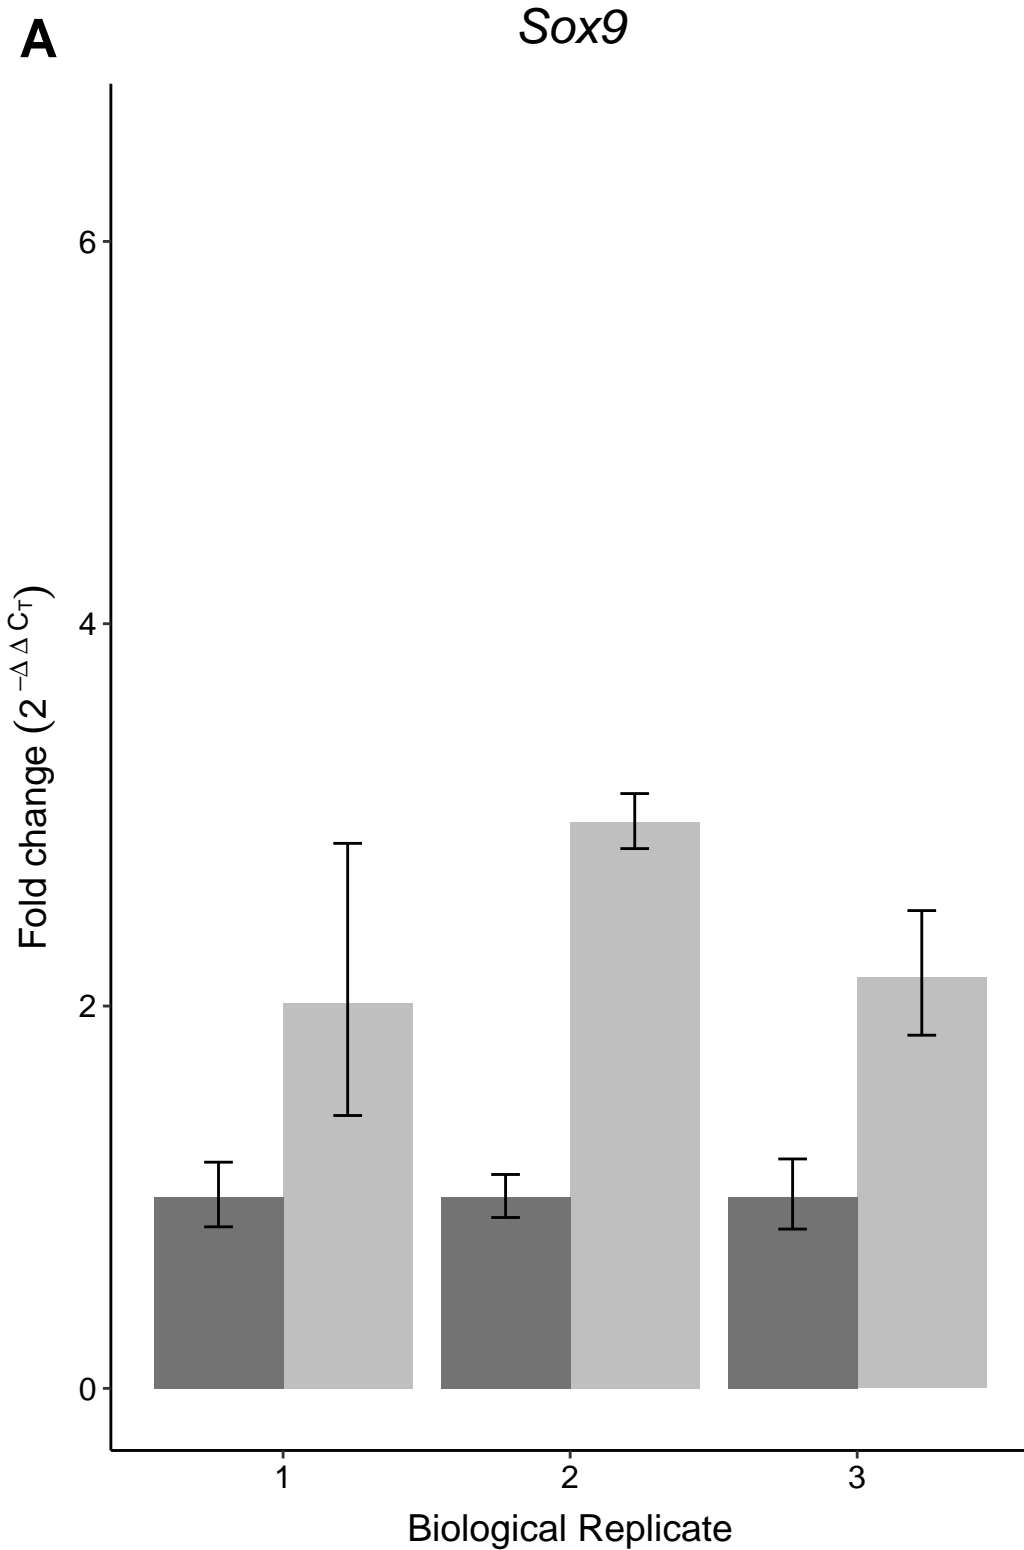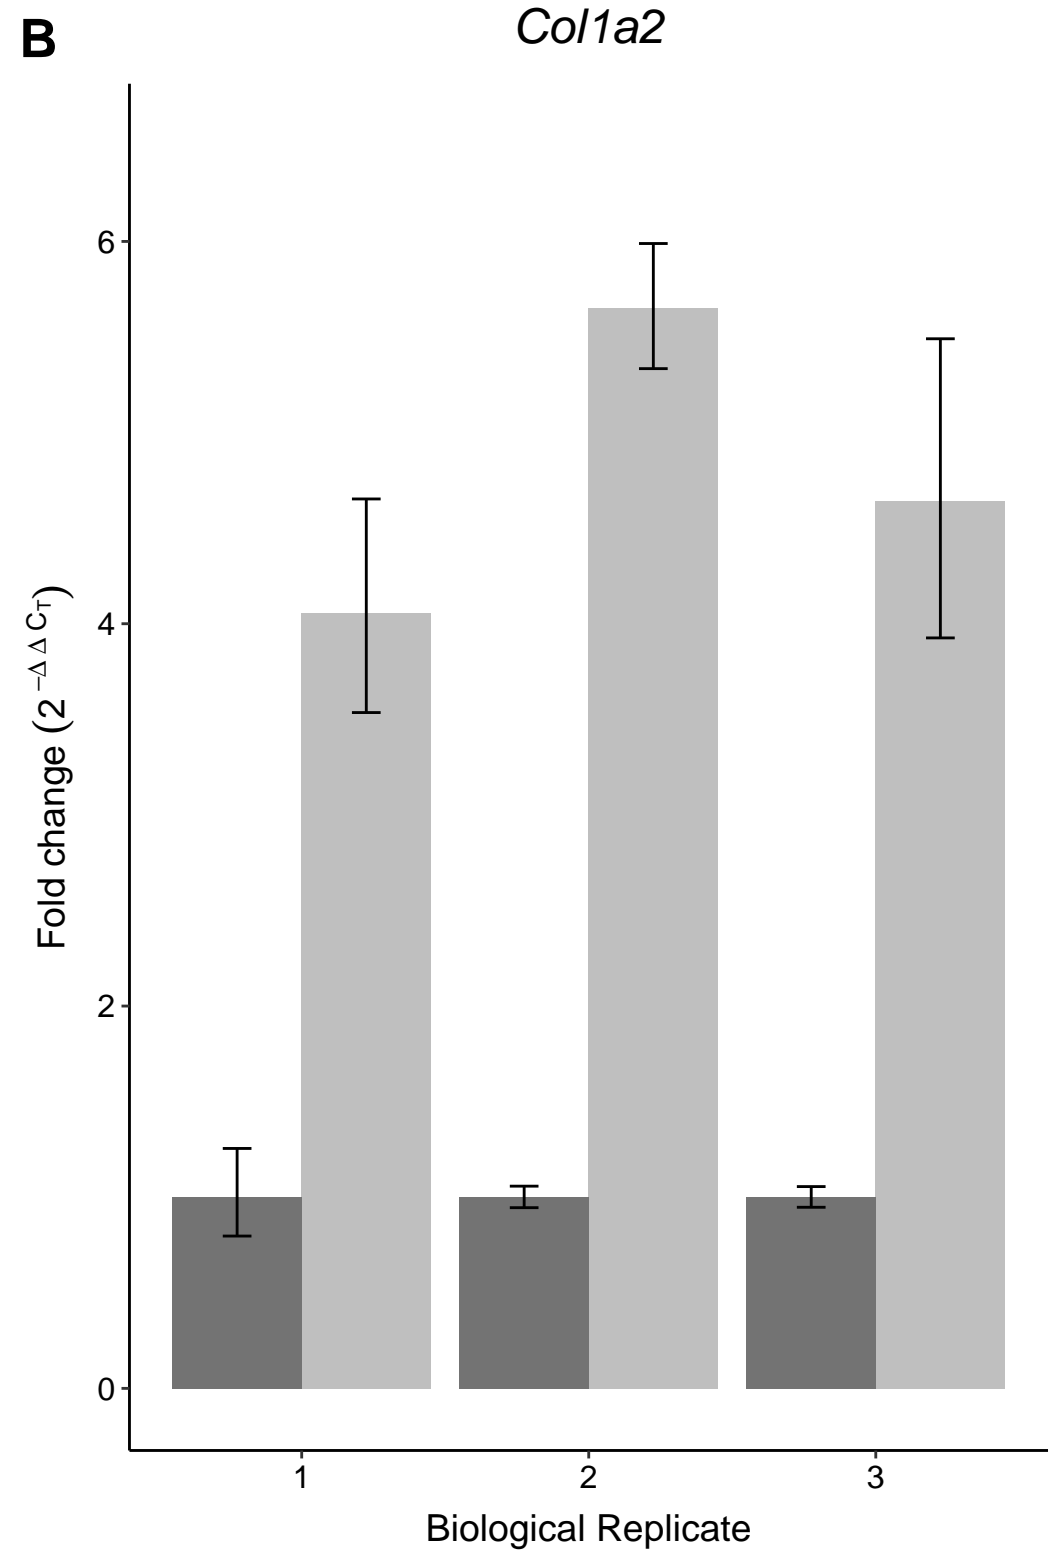

uninjured injured
